# Supplementary figures and images for: Deepening into Intracellular Signaling Landscape through Integrative Spatial Proteomics and Transcriptomics in a Lymphoma Model
Source: MDPI journal article supplement (doi:10.3390/biom11121776), 2021-11-26

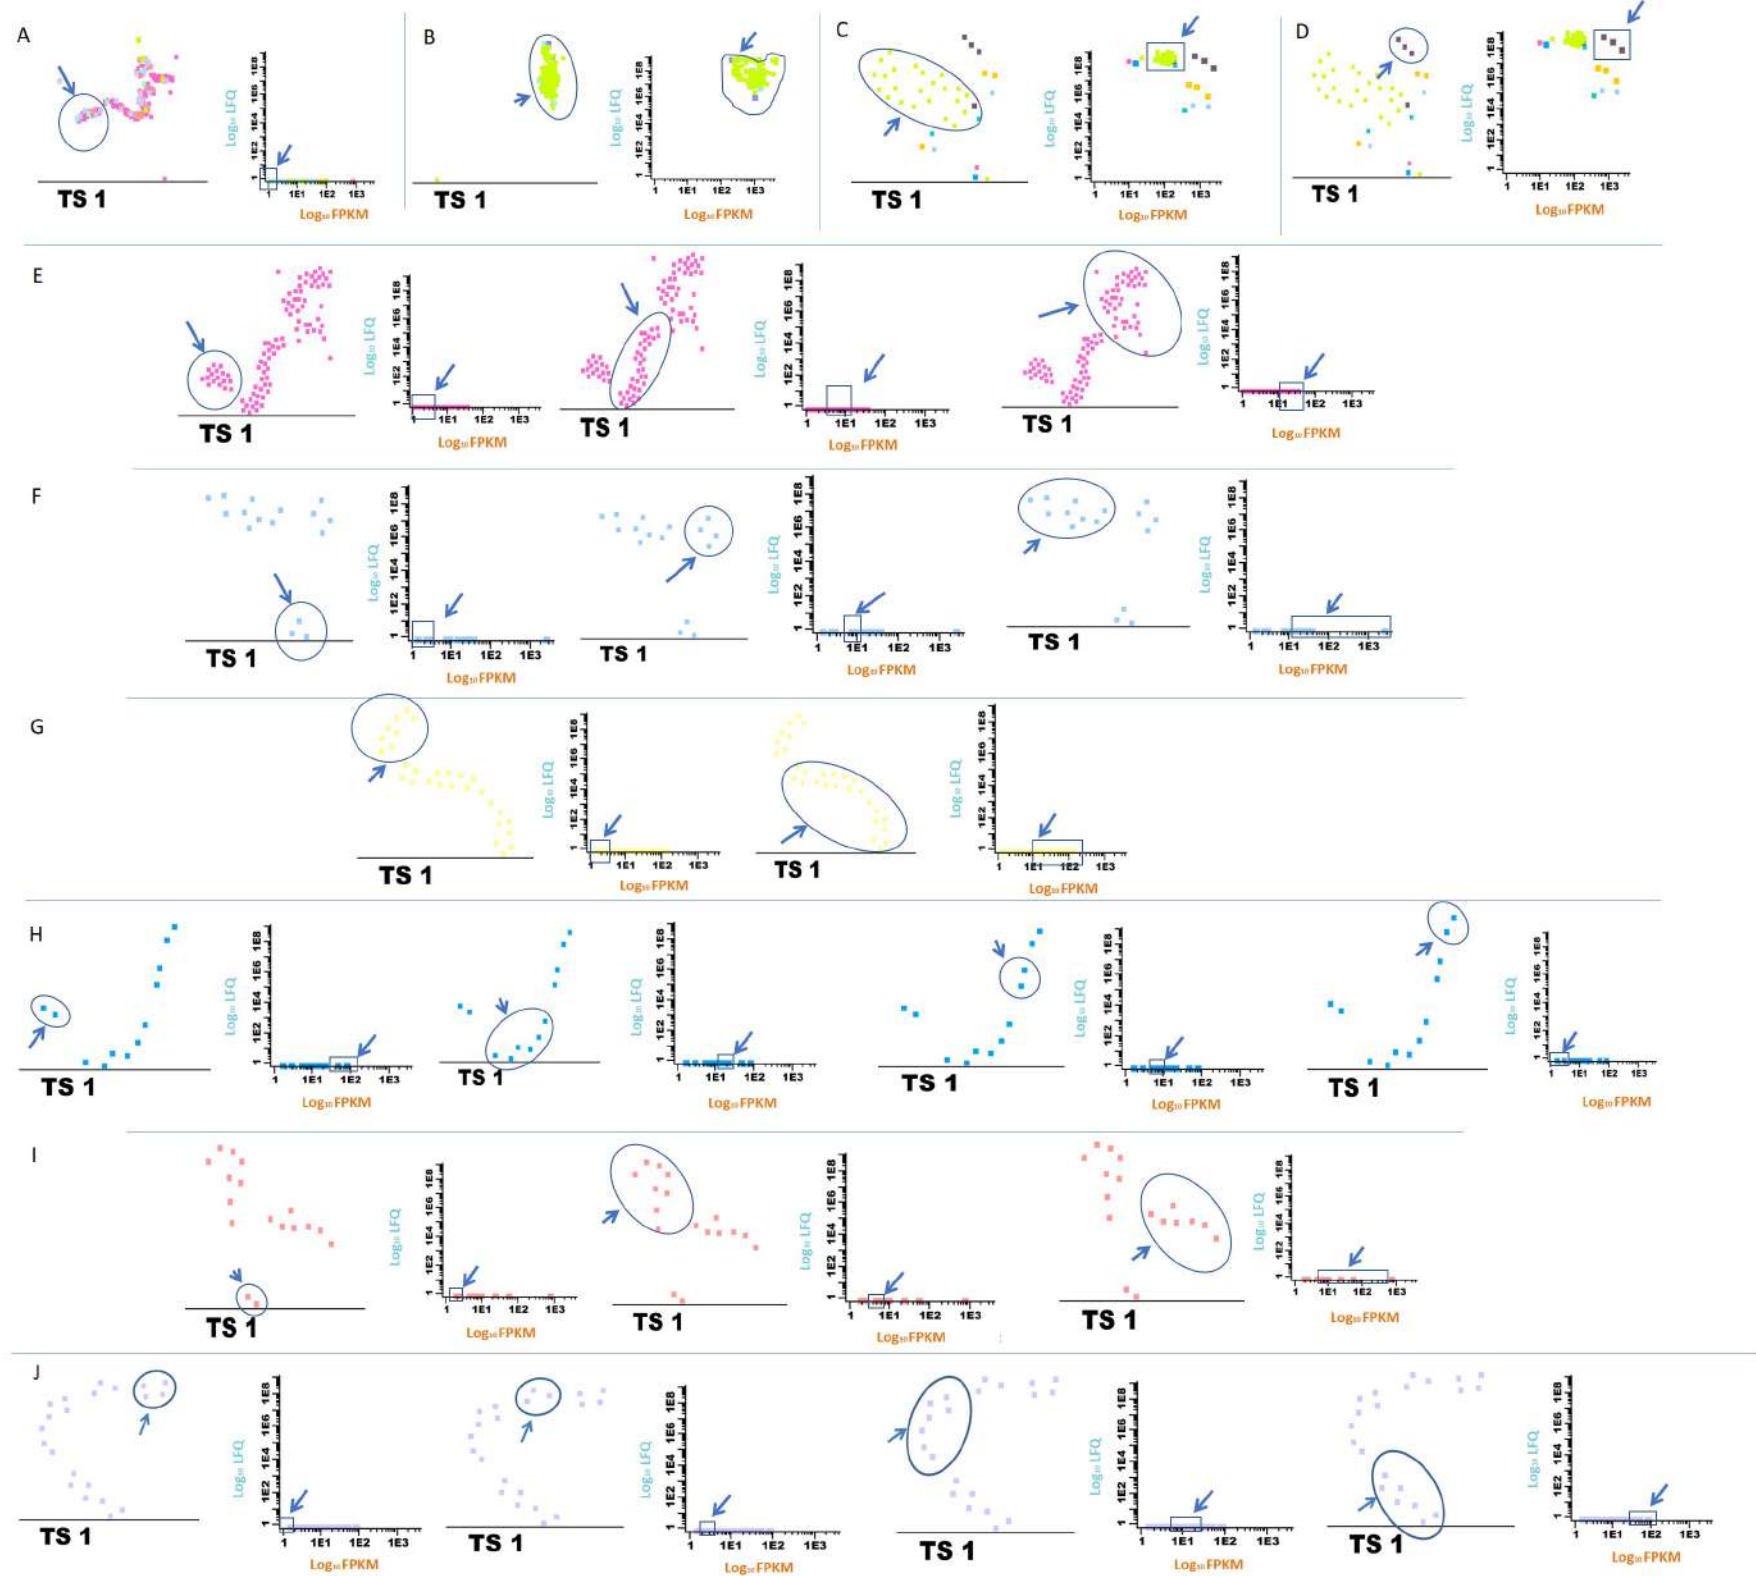

Supplement: s1 [file s1]

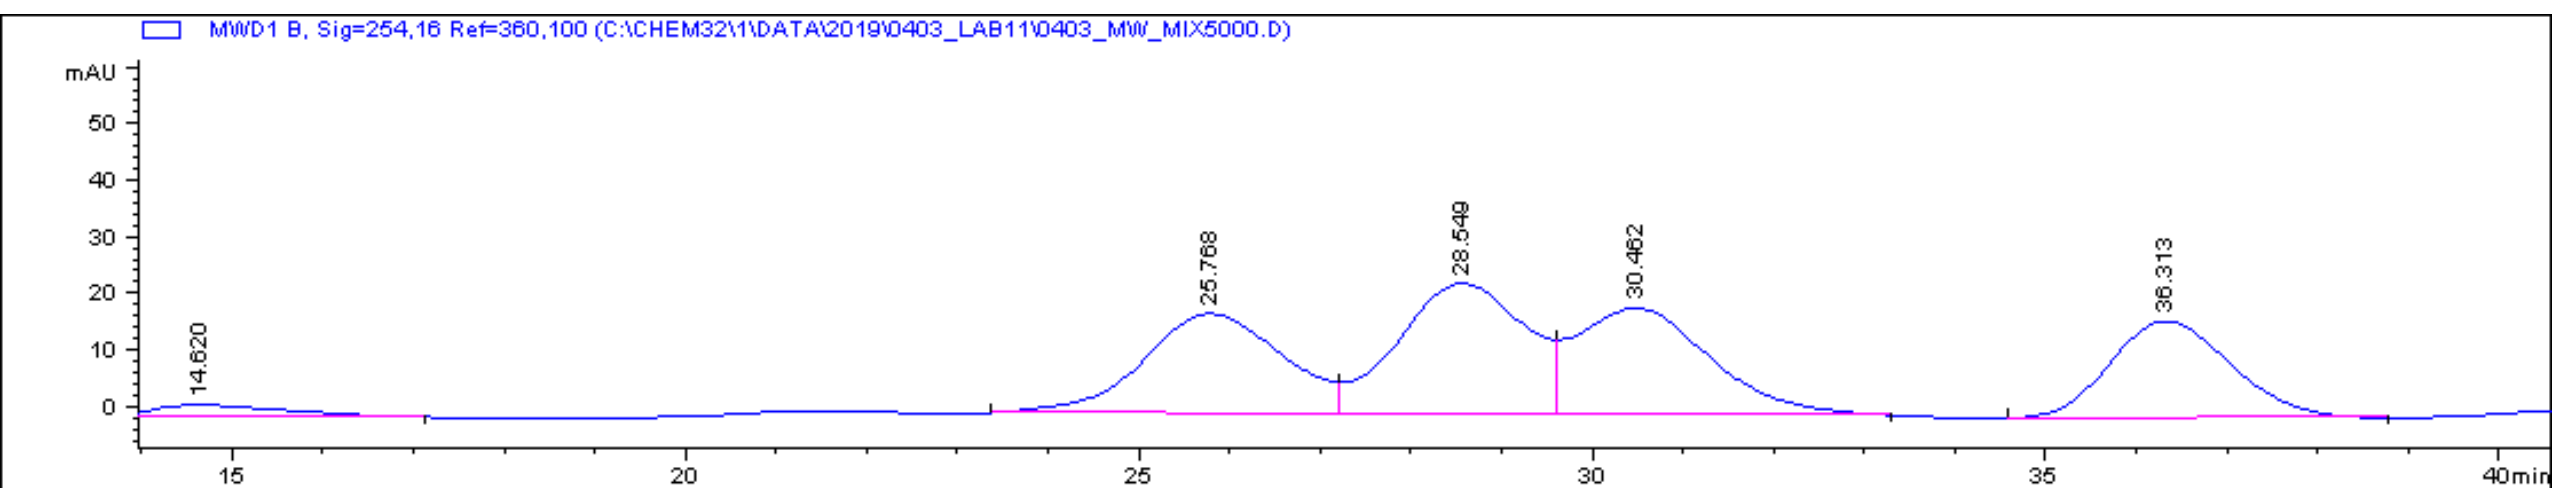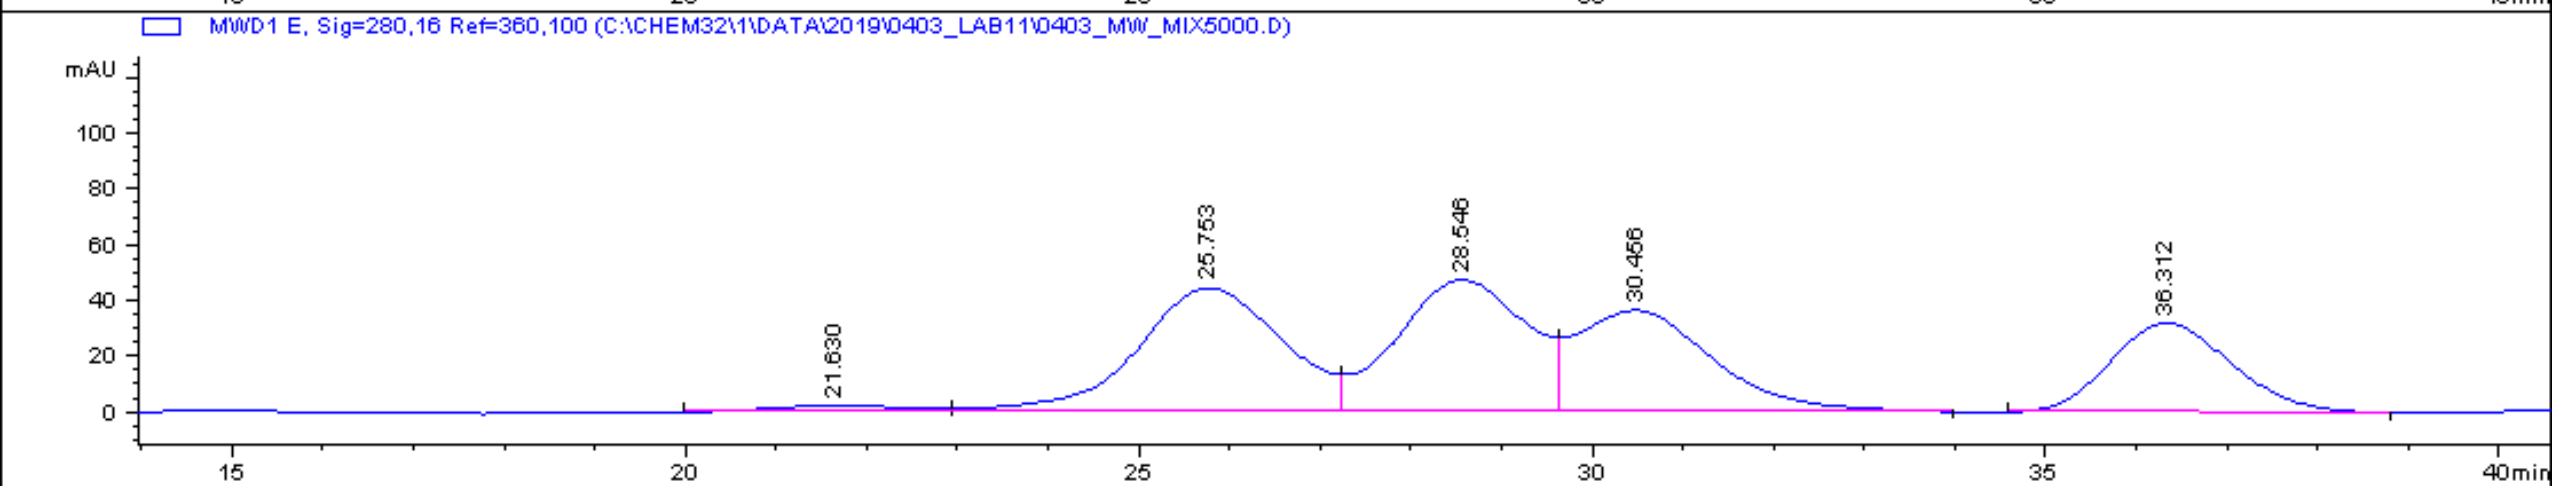

Supplement: s1 [file s1]

**A**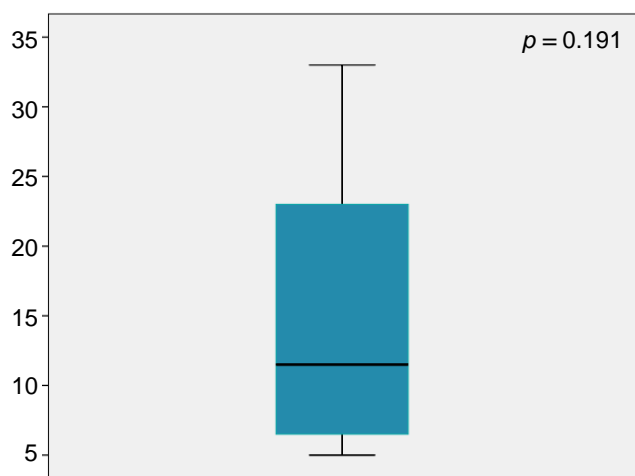**B**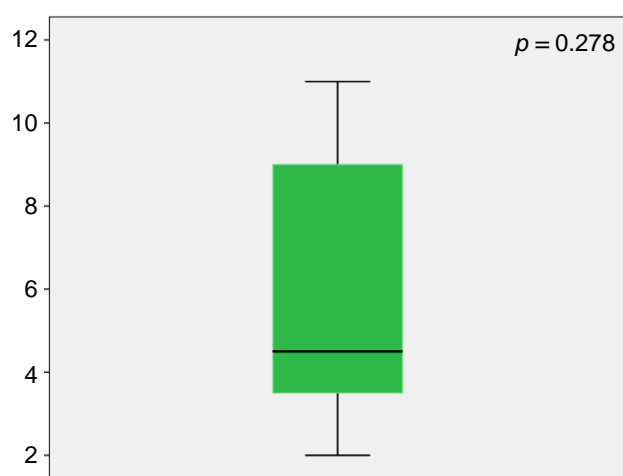**C**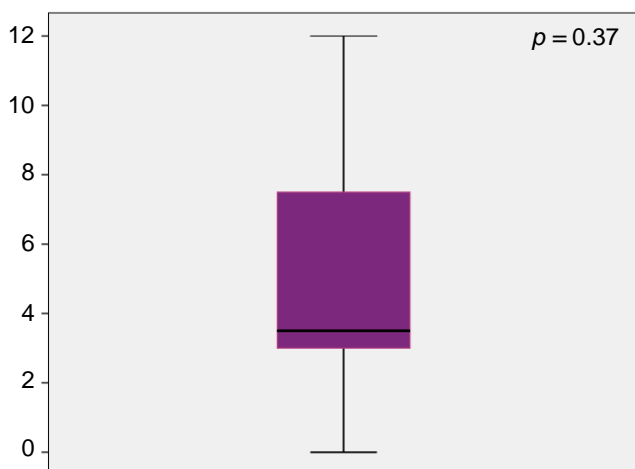**D**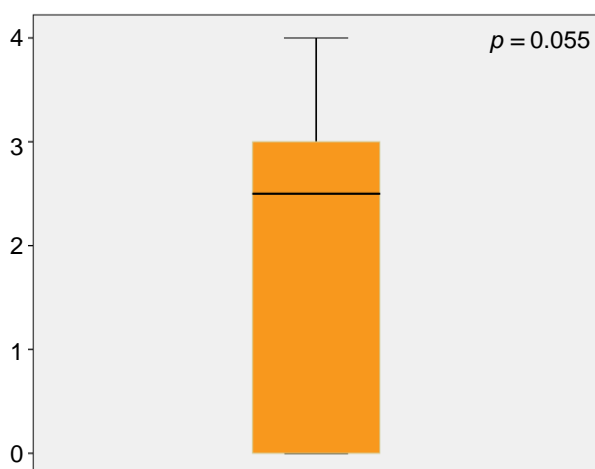**E**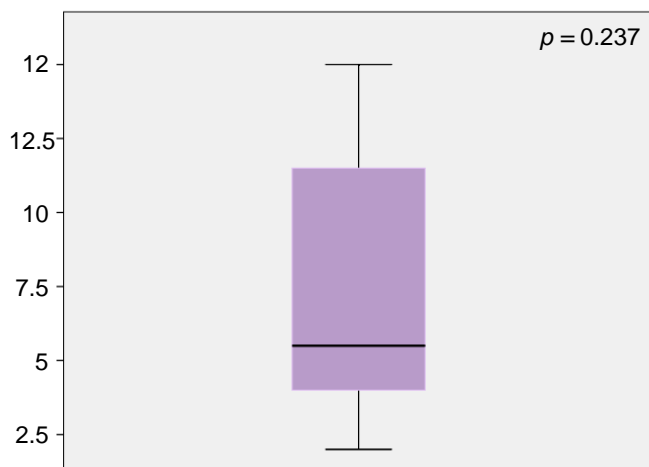**F**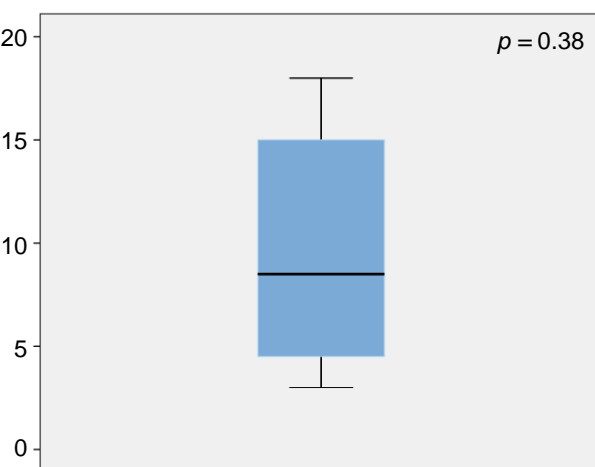**G**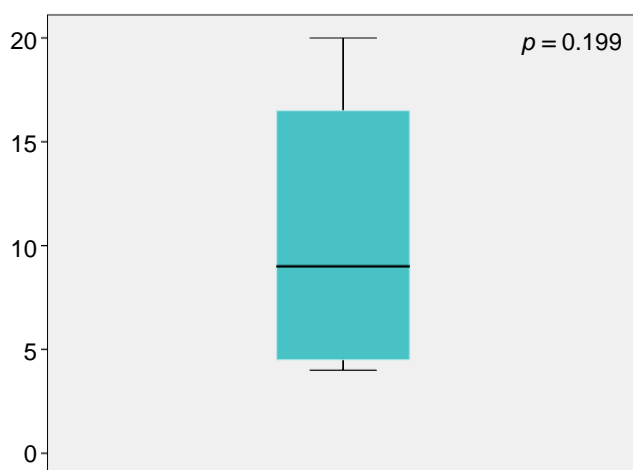

Supplement: s1 [file s1]

A

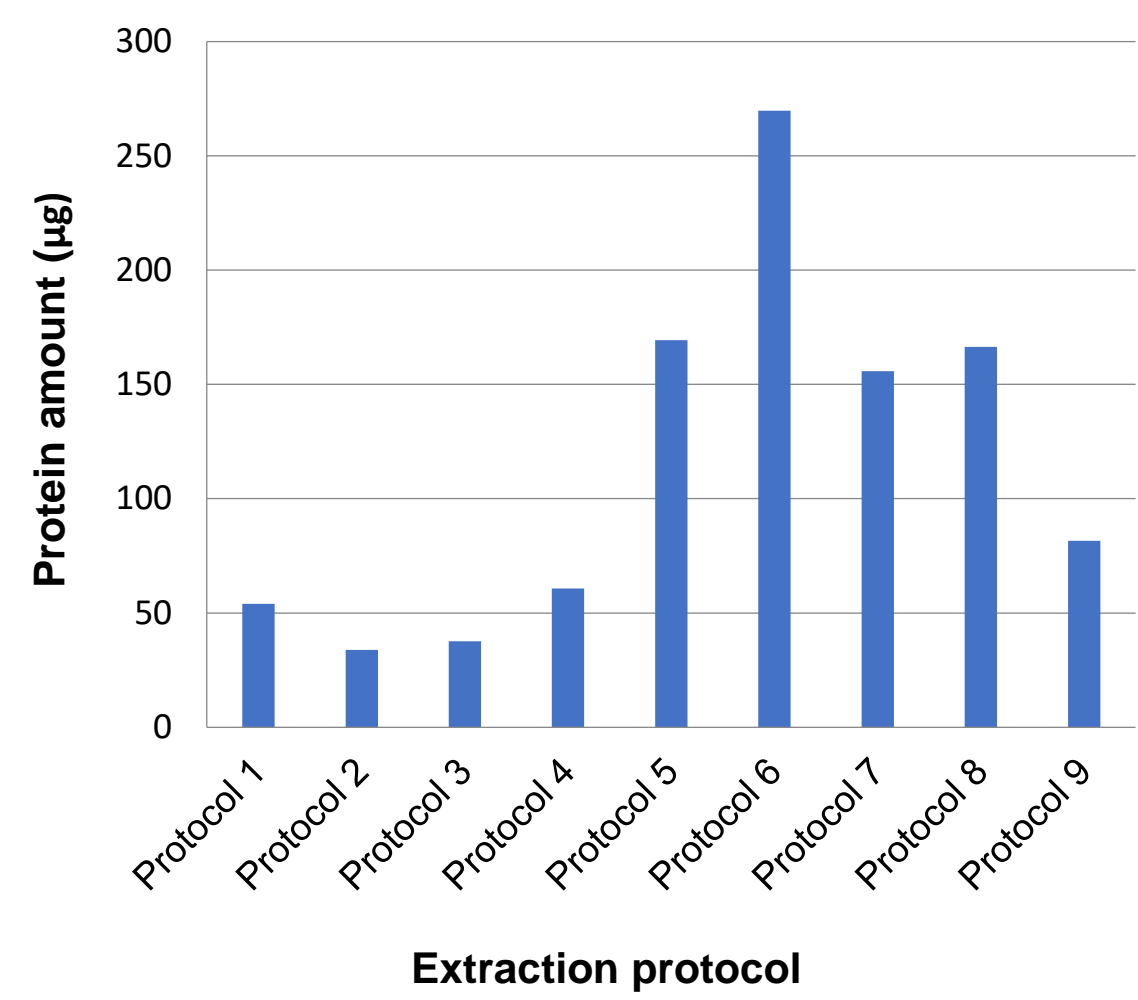

B

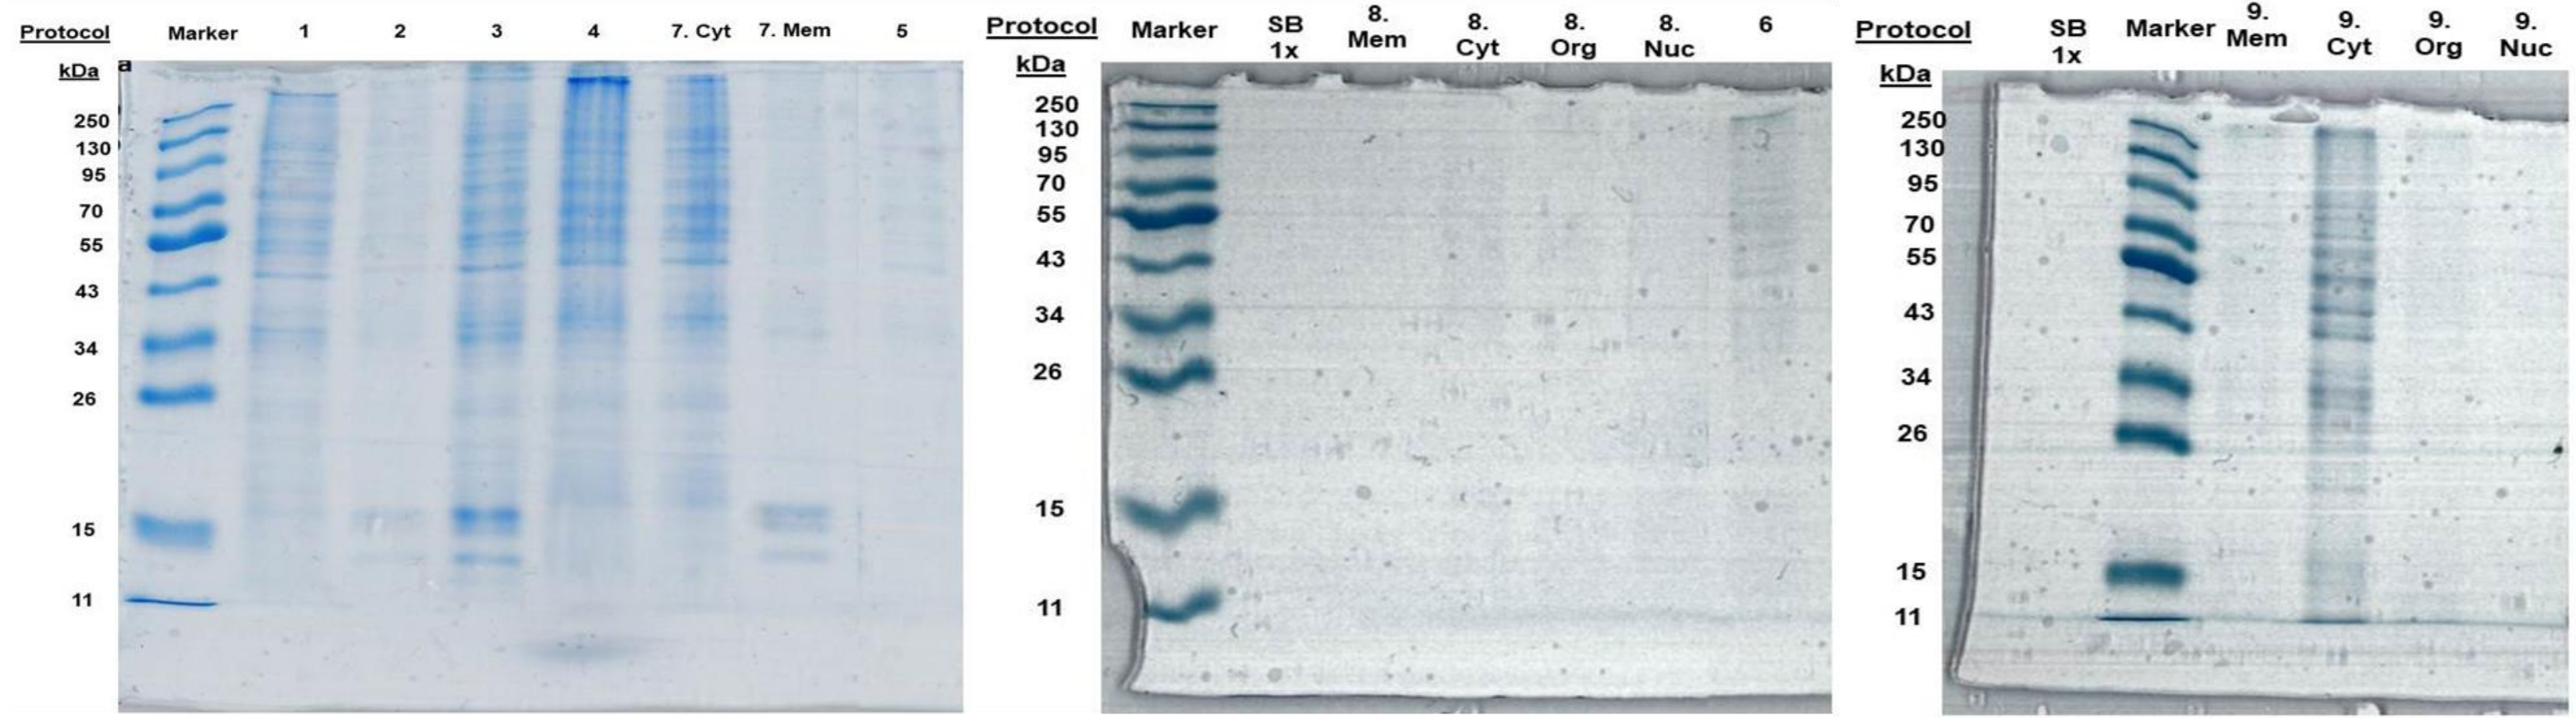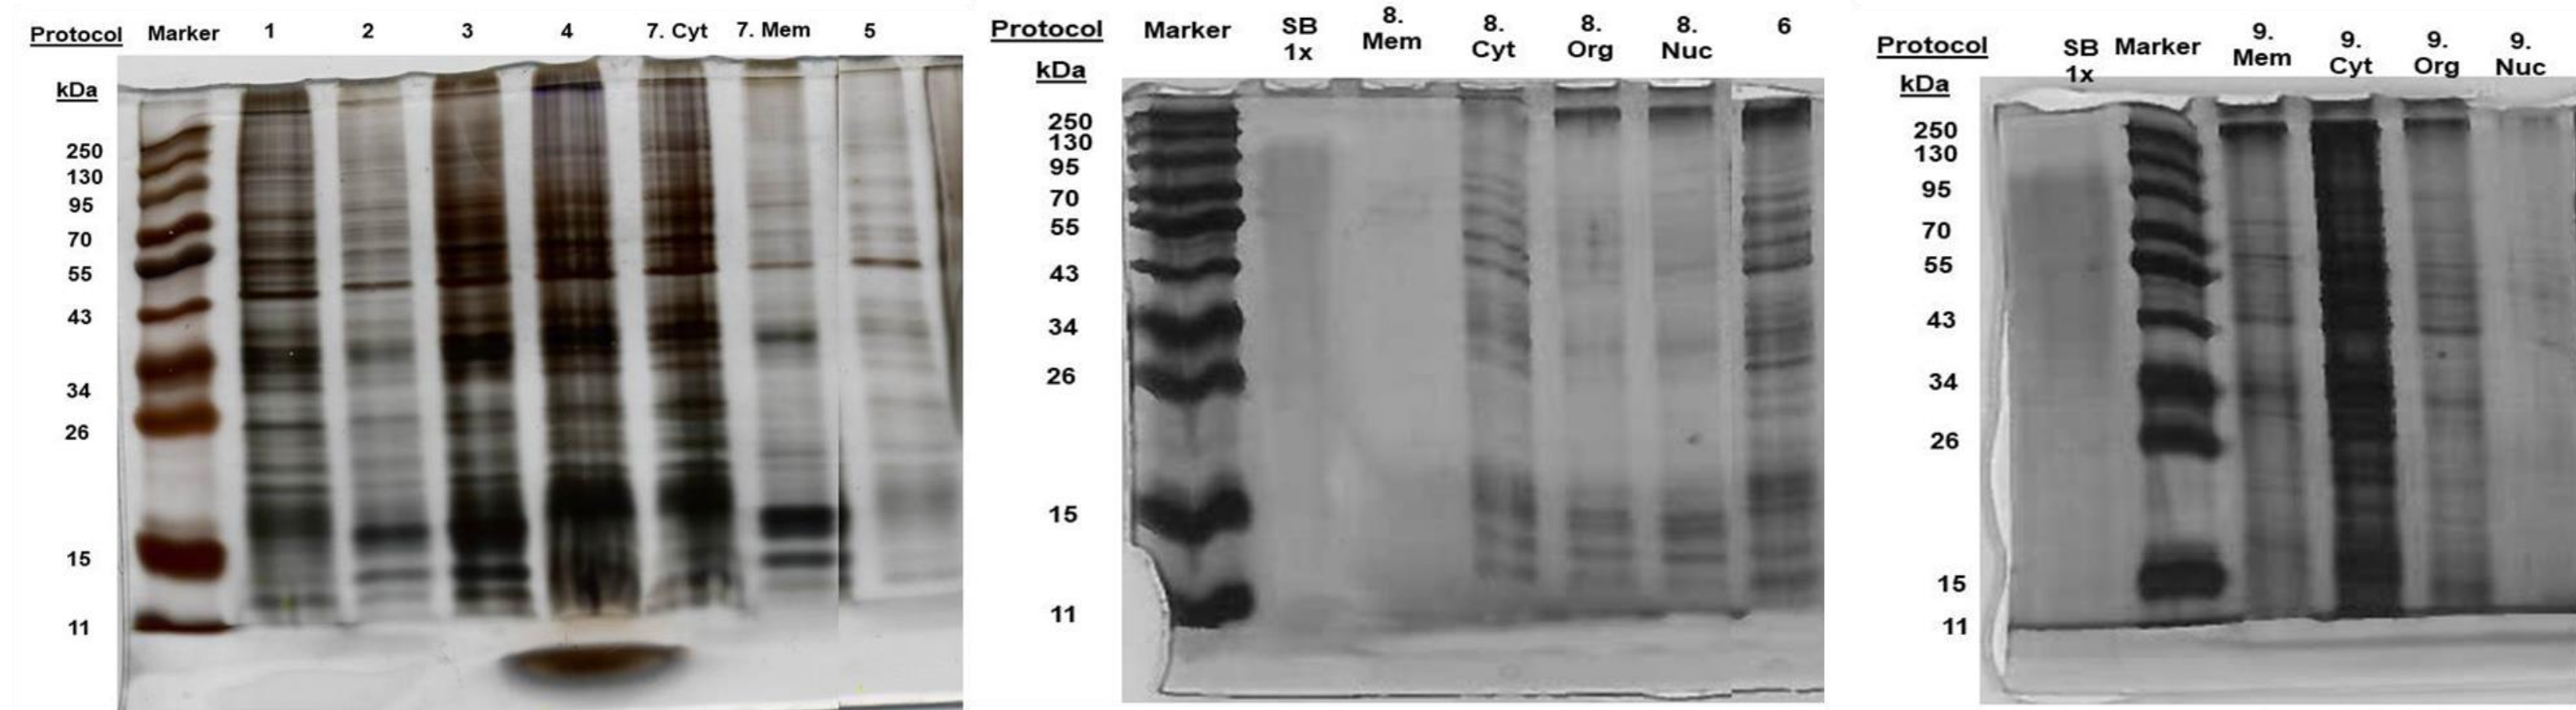

SDS-PAGE 12%

Supplement: s1 [file s1]

**A**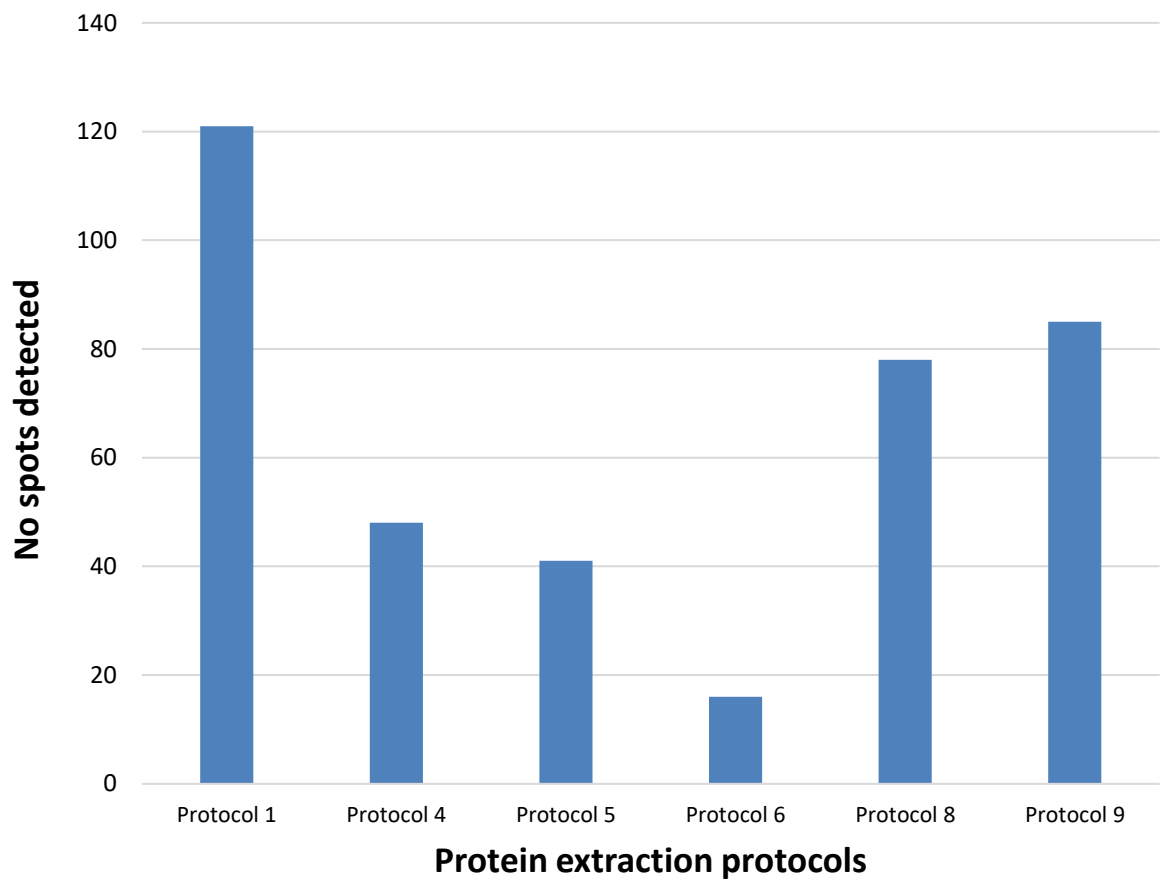**B**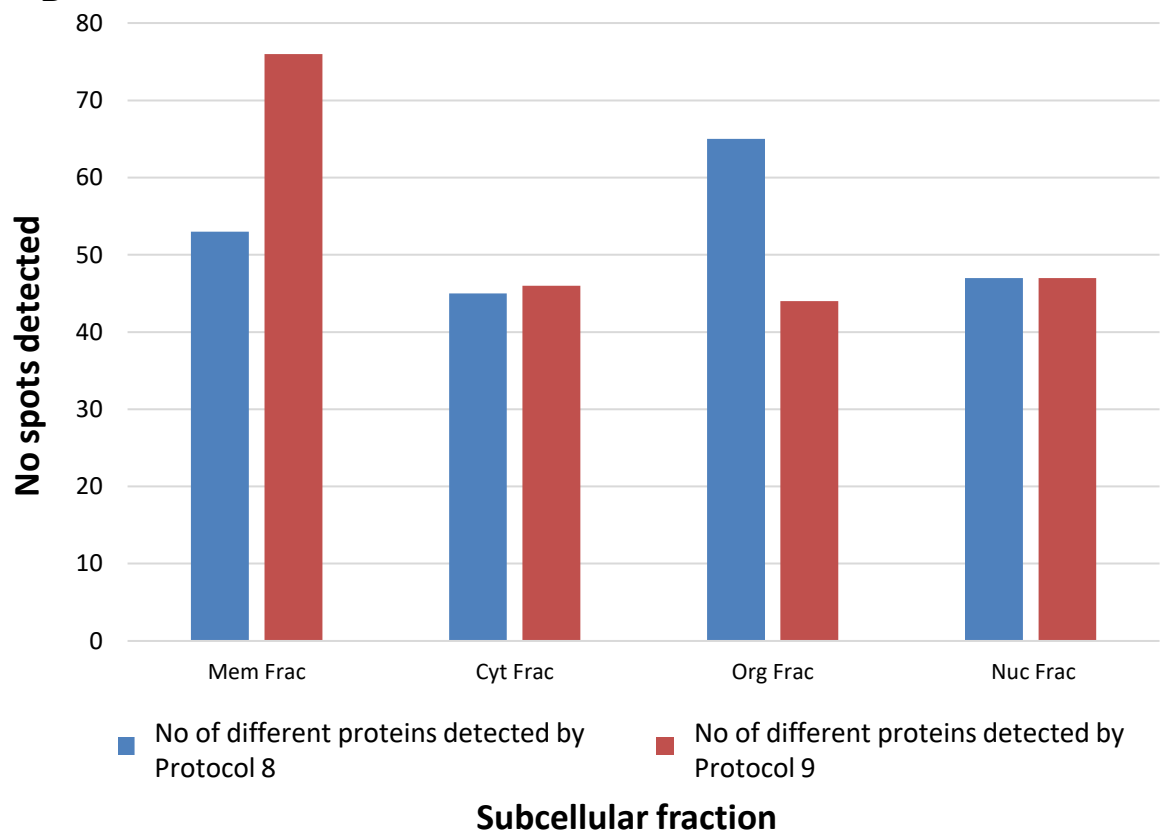

Supplement: s1 [file s1]

A

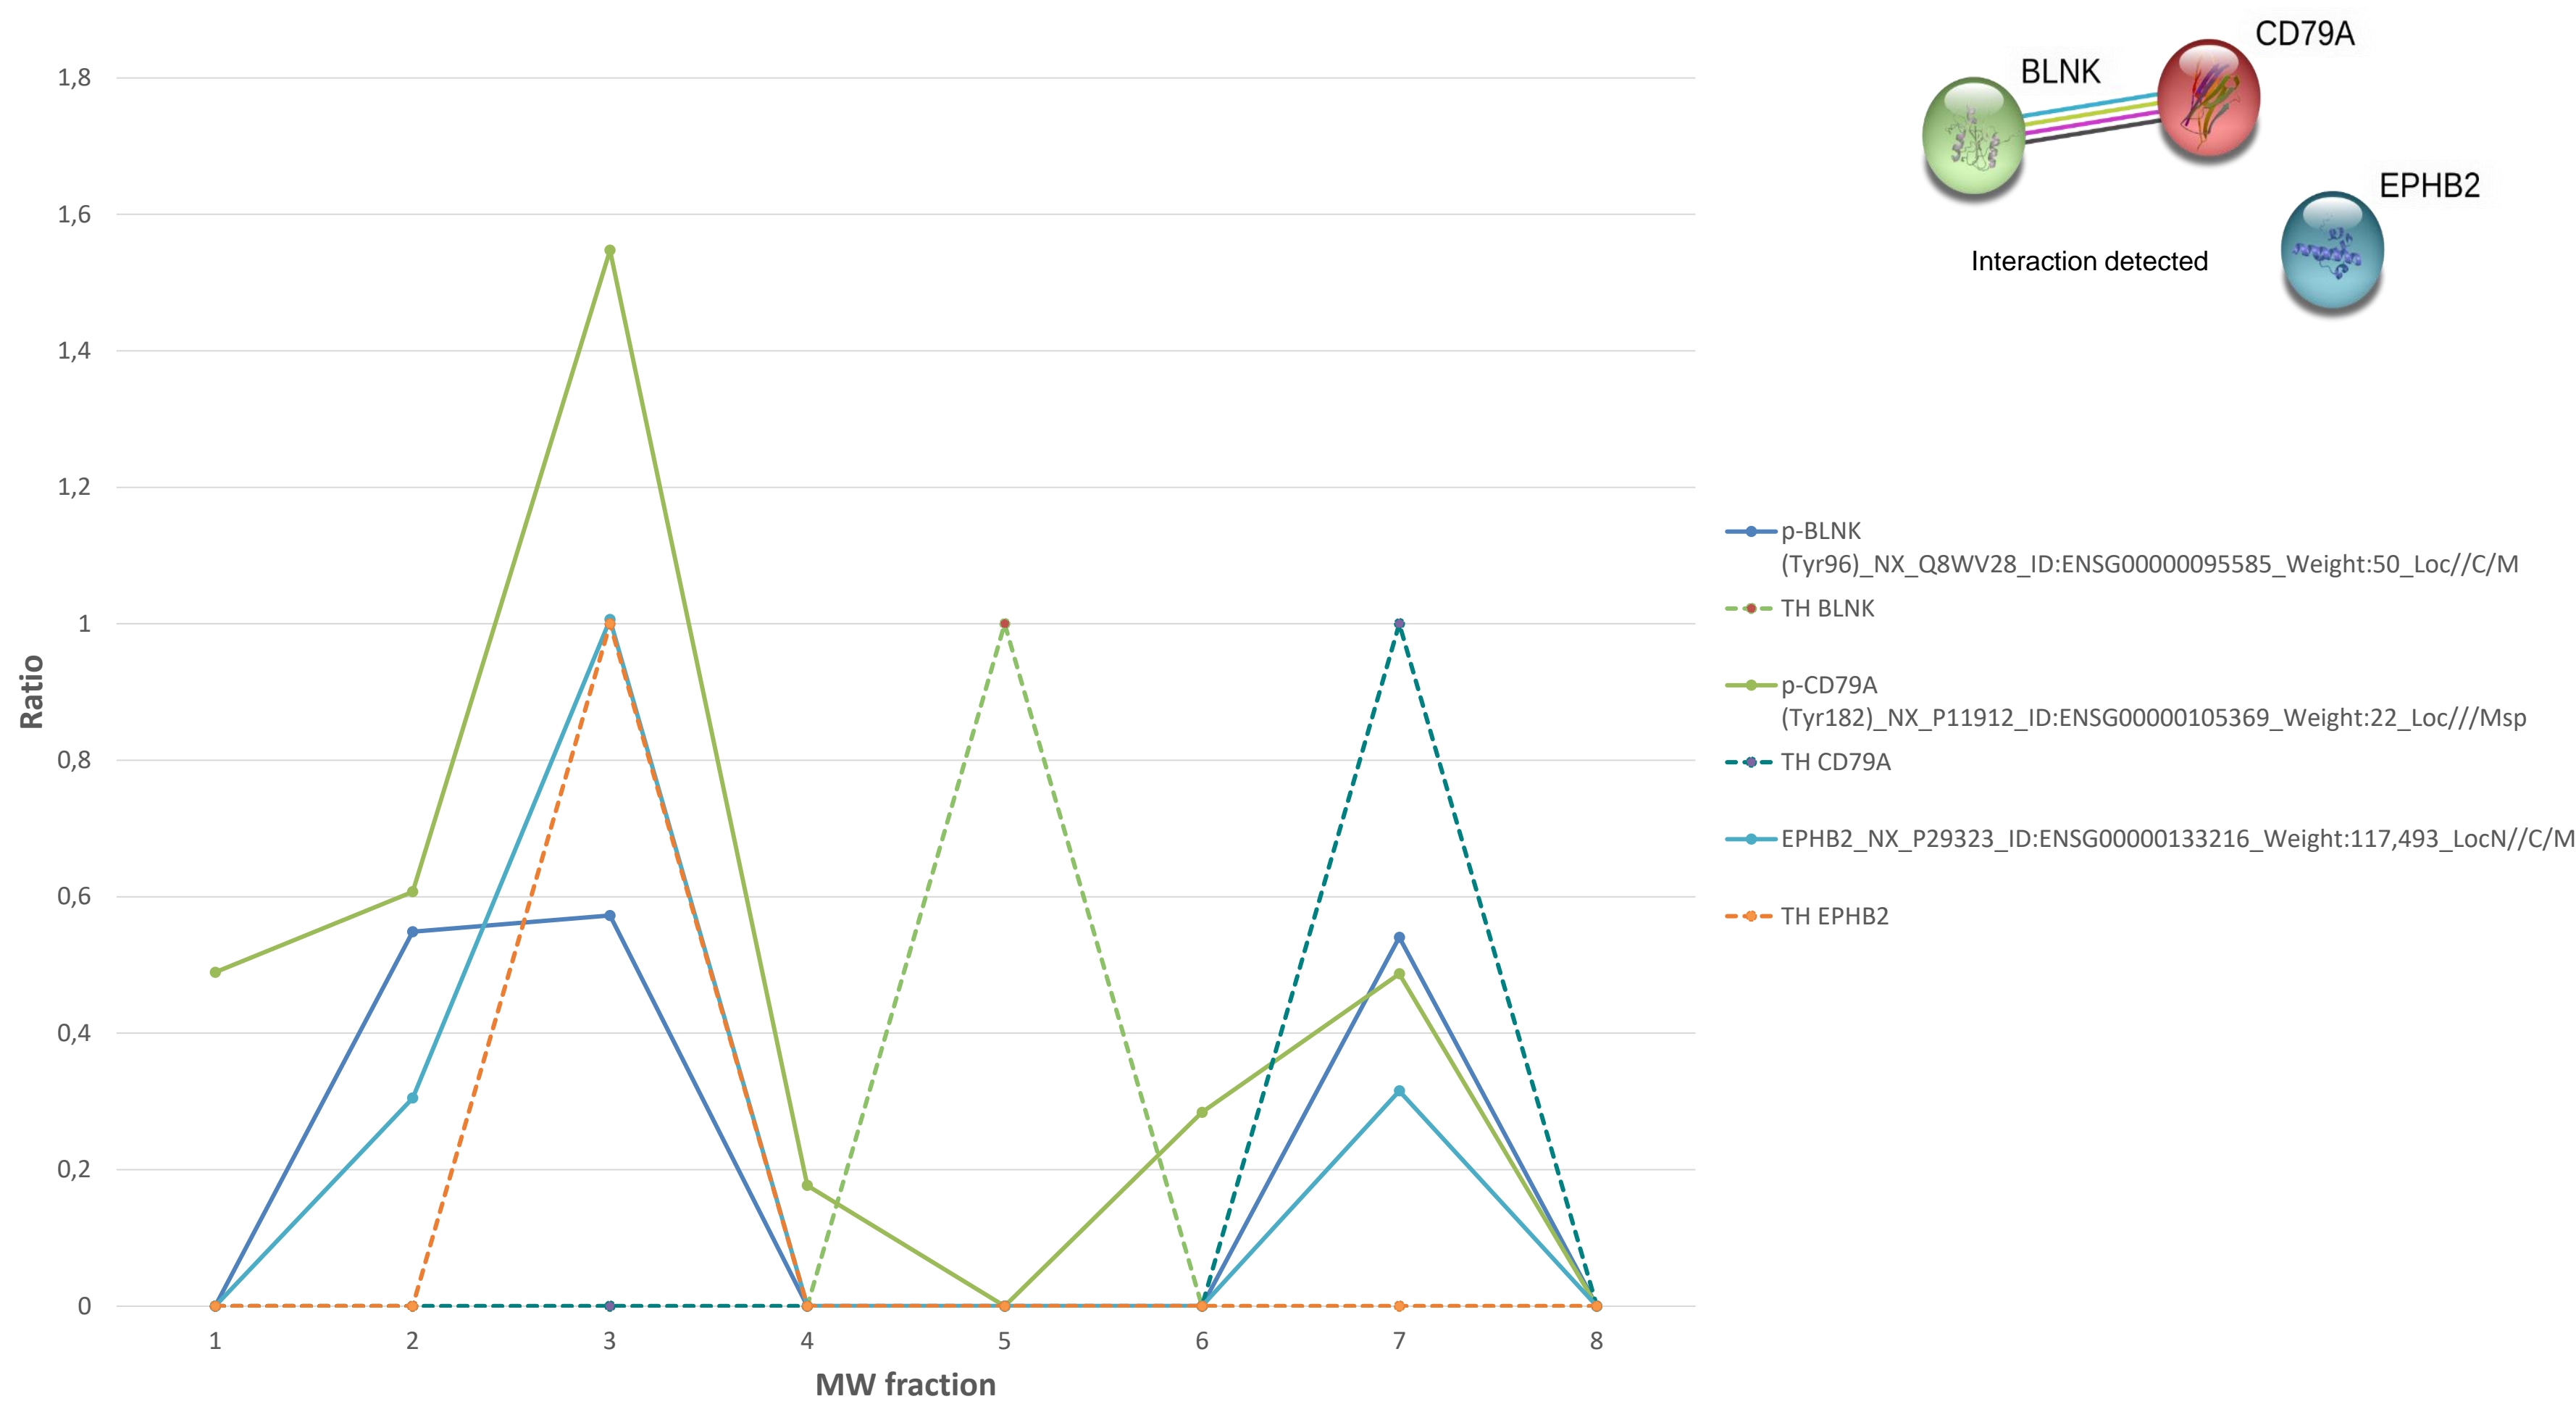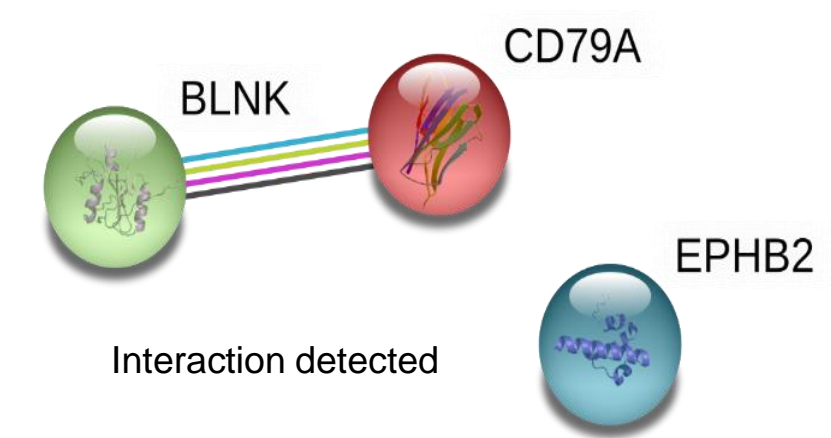

B

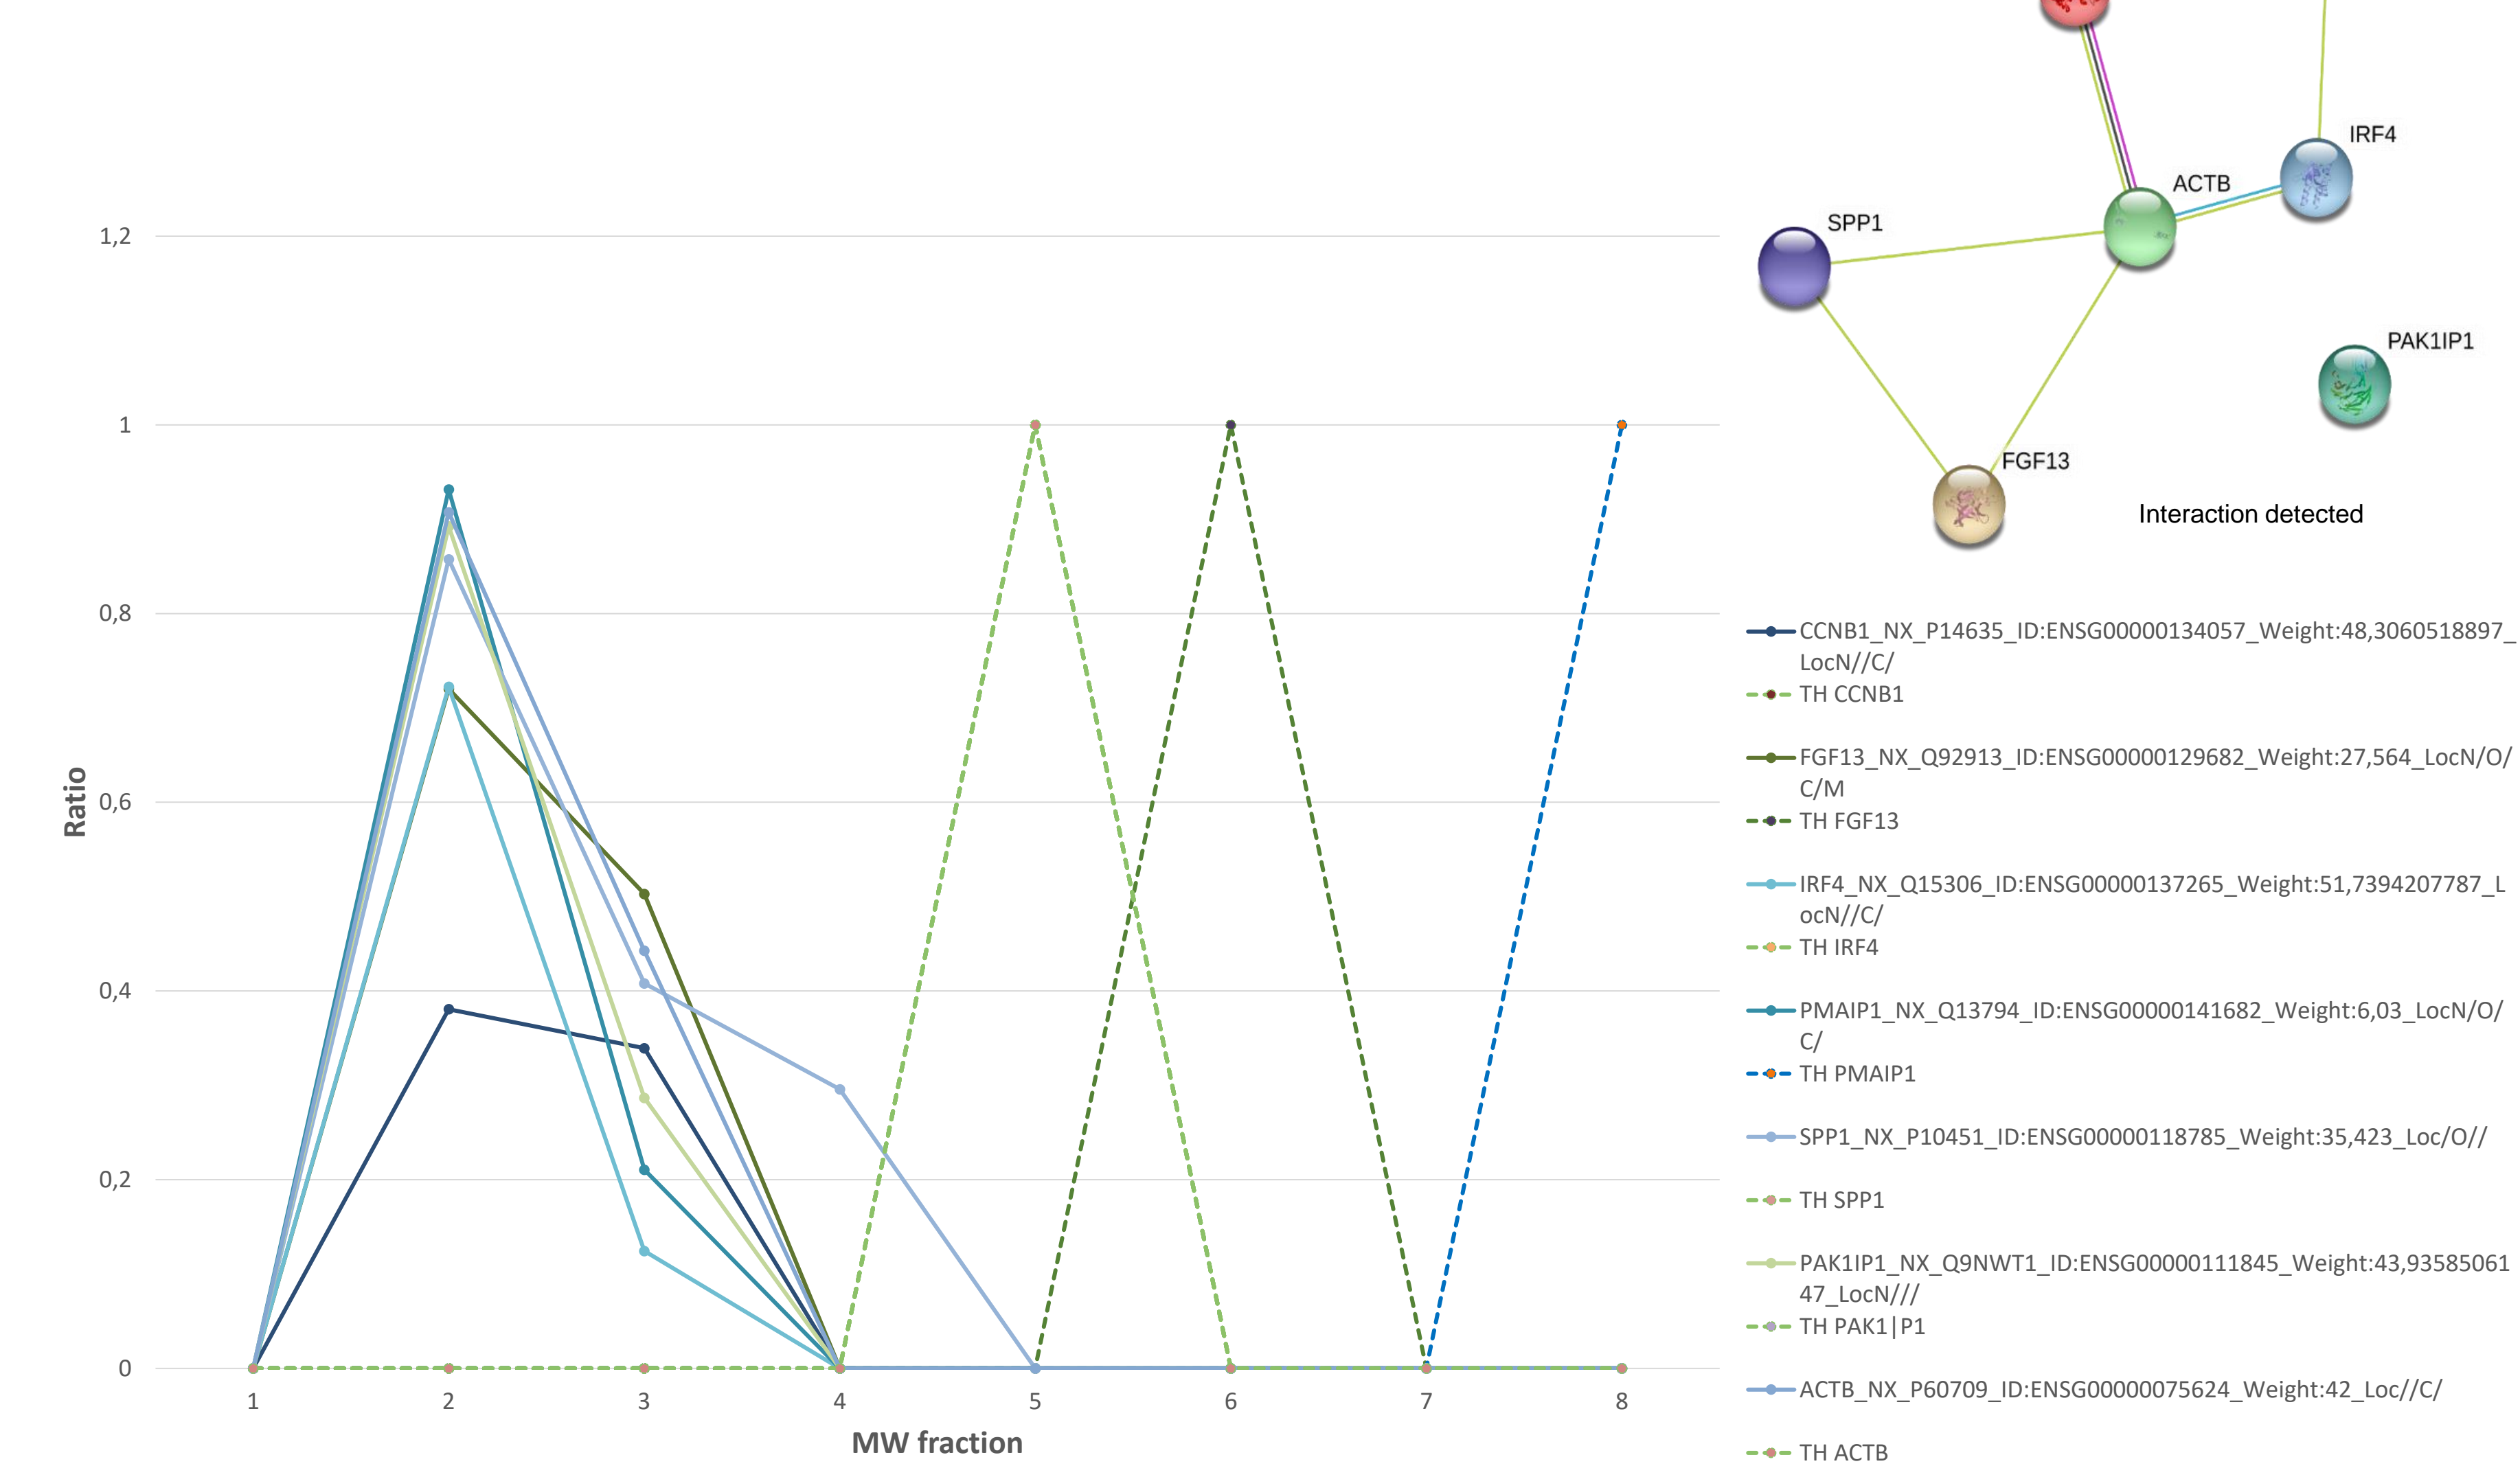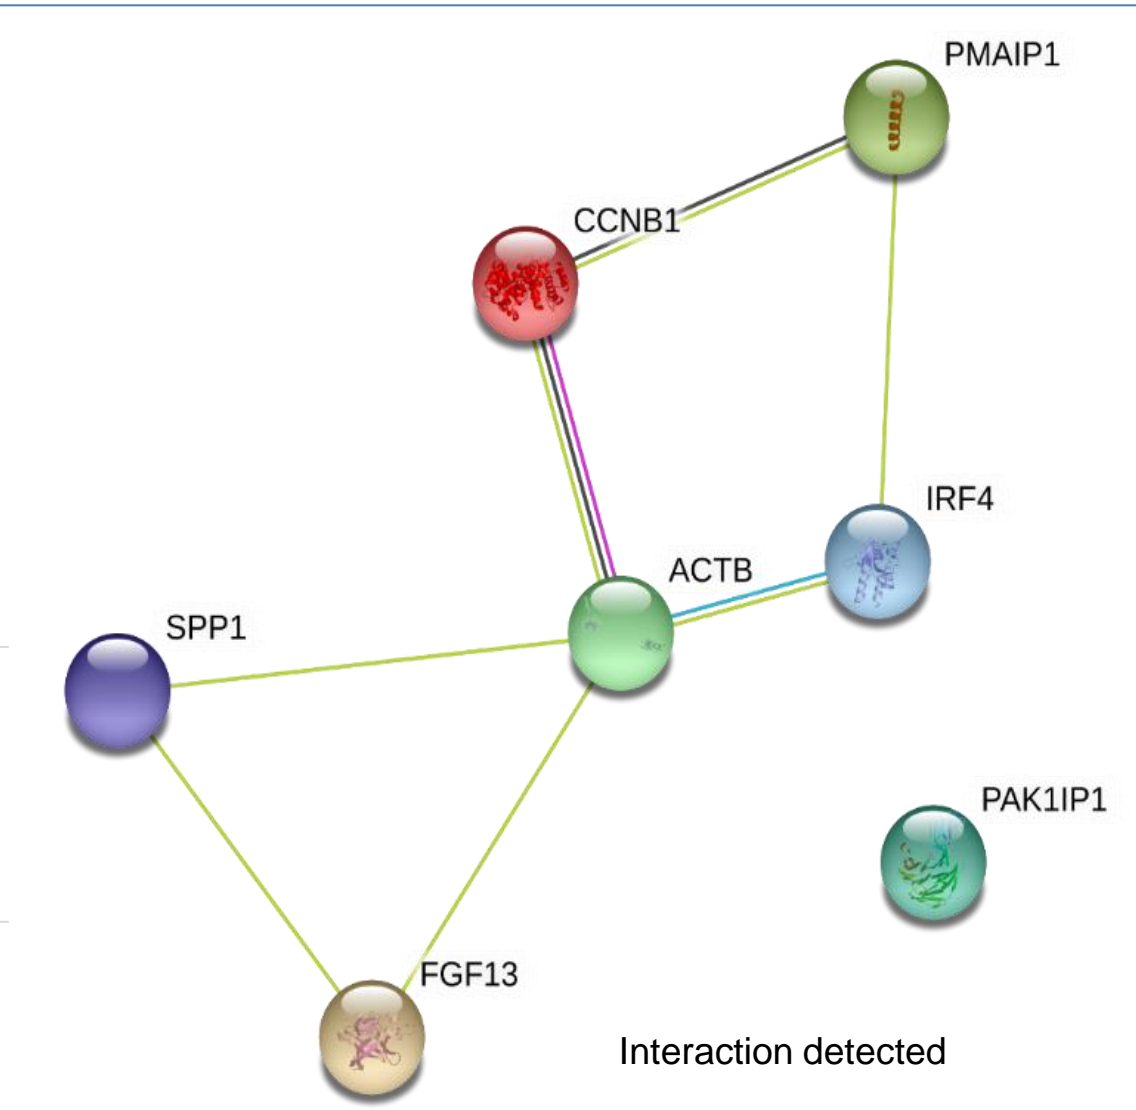

C

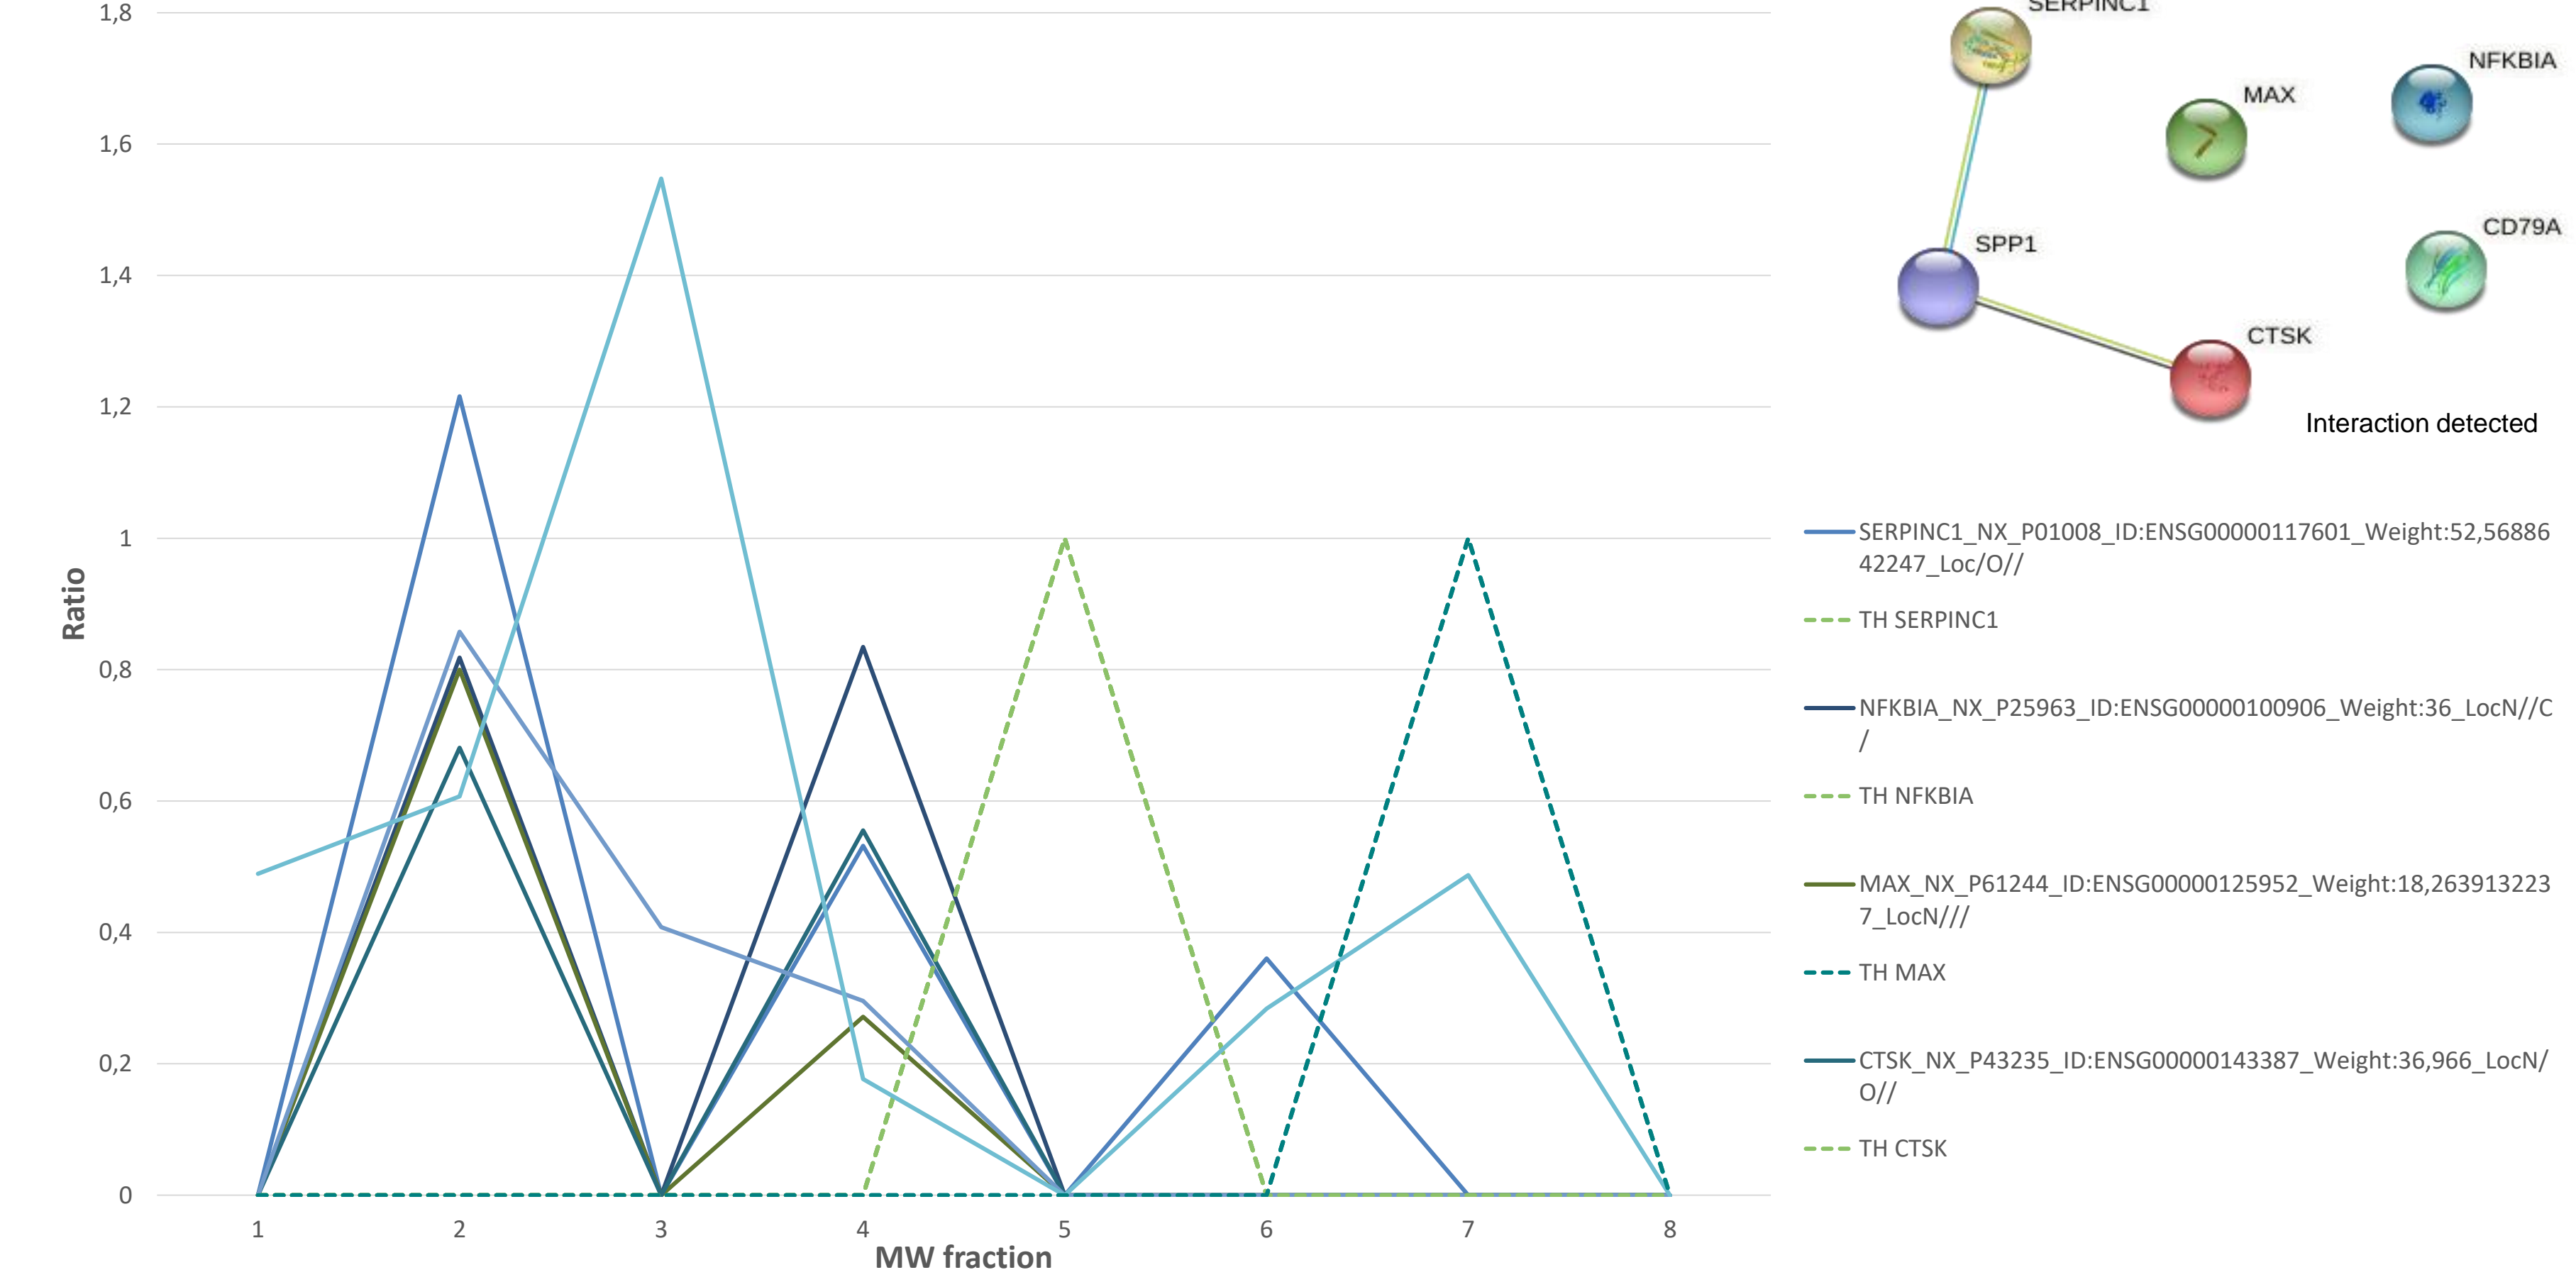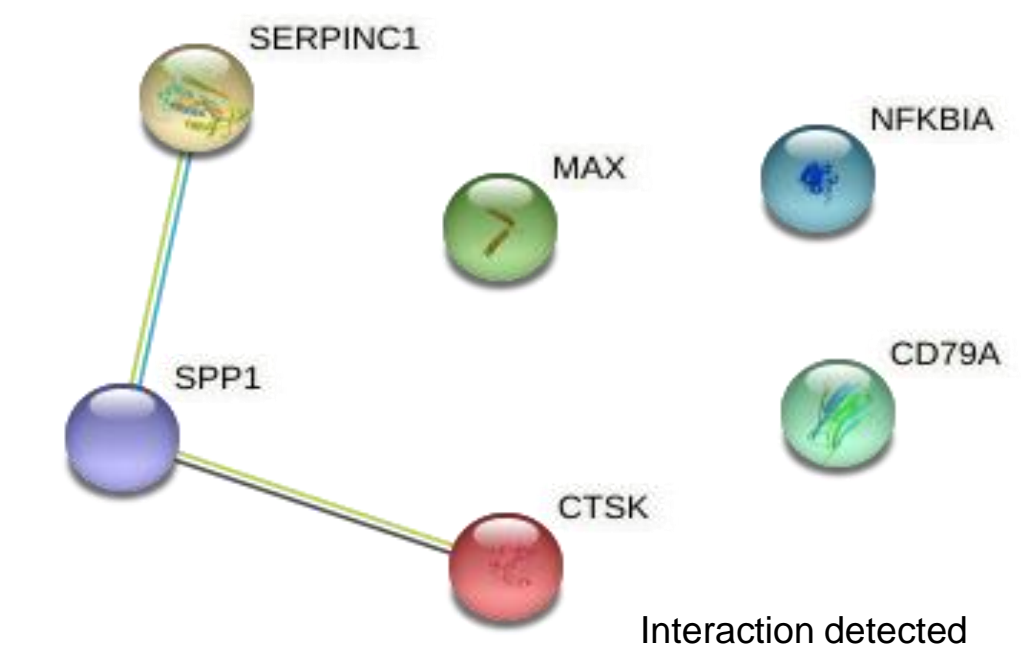

Supplement: s1 [file s1]

A

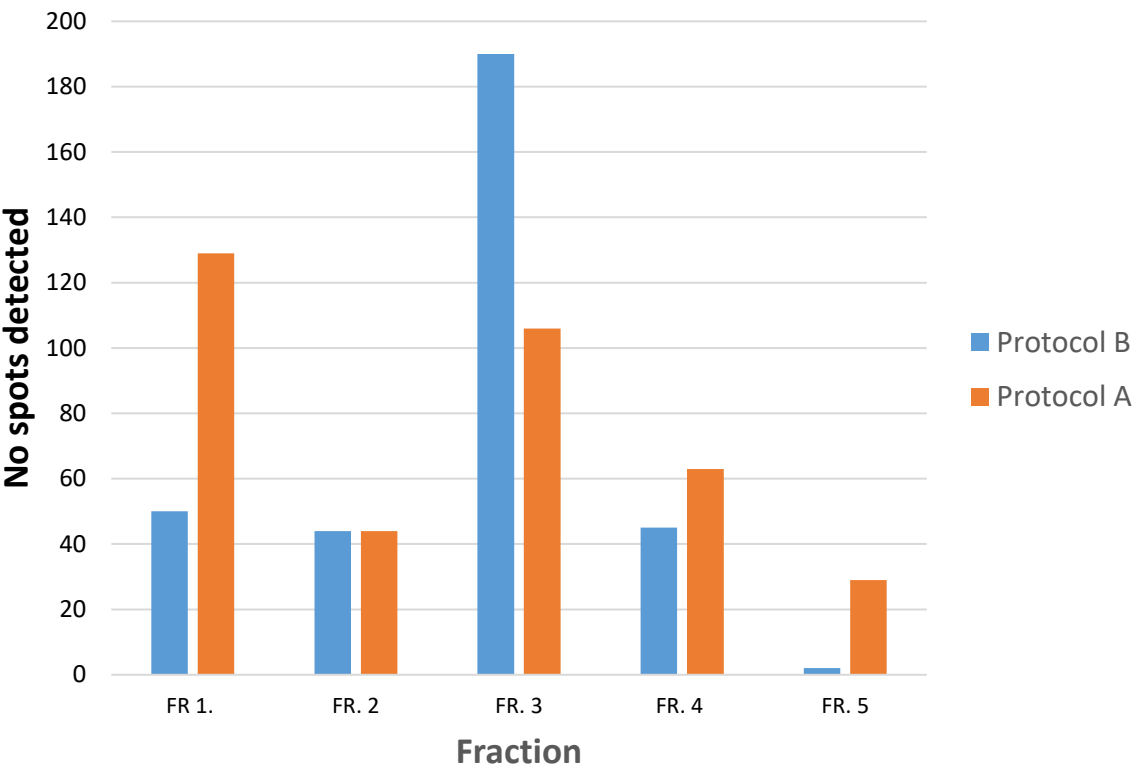

B

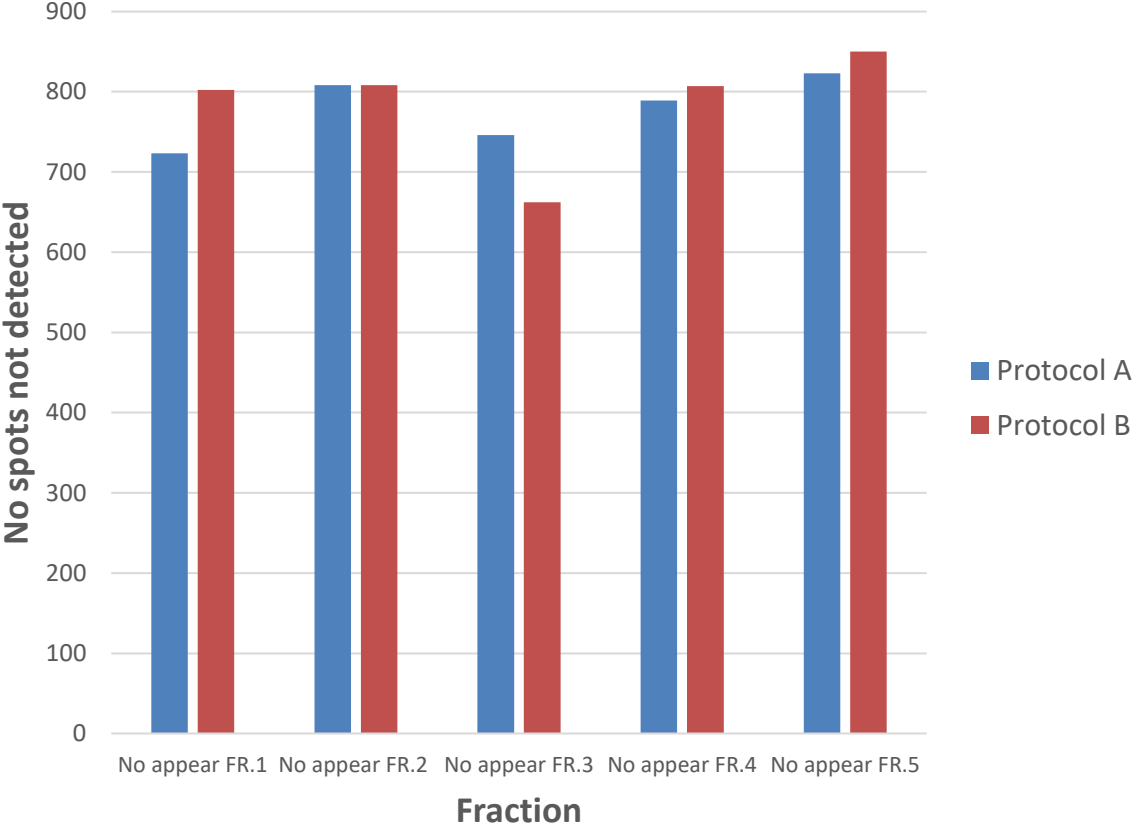

Supplement: s1 [file s1]
